# Supplementary material for: Non-Inferiority Trial of Remimazolam vs. Propofol for Fast-Track Anesthesia in Congenital Heart Disease Patients
Source: Research Square preprint supplement (doi:10.21203/rs.3.rs-7702000/v1), 2026-01-13
Supplement: Supplementary file 1 [file 4b73cc09303b20785d8519d2.pdf]

## CONSORT 2010 Checklist for Randomized Controlled Trials

Study Title: Non-Inferiority Trial of Remimazolam vs. Propofol for Fast-Track Anesthesia in Congenital Heart Disease Patients

Based on: Schulz KF, Altman DG, Moher D, et al. CONSORT 2010 Statement: Updated guidelines for reporting parallel group randomized trials.

| Section/Topic      | Item No. | Checklist Item                                                              | Reported on Page No. |
|--------------------|----------|-----------------------------------------------------------------------------|----------------------|
| Title and Abstract | 1a       | Identification as a randomized trial in the title                           | 1                    |
|                    | 1b       | Structured summary of trial design, methods, results, and conclusions       | 1–2                  |
| Introduction       | 2a       | Scientific background and explanation of rationale                          | 2–3                  |
|                    | 2b       | Specific objectives or hypotheses                                           | 3                    |
| Methods            | 3a       | Description of trial design (such as parallel, non-inferiority, randomized) | 4                    |
|                    | 3b       | Important changes to methods after trial commencement, with reasons         | N/A                  |
| Participants       | 4a       | Eligibility criteria for participants                                       | 4–5                  |

|                                  |    |                                                                                      |     |
|----------------------------------|----|--------------------------------------------------------------------------------------|-----|
|                                  | 4b | Settings and locations where the data were collected                                 | 4   |
| Interventions                    | 5  | The interventions for each group with sufficient details to allow replication        | 5   |
| Outcomes                         | 6a | Clearly defined primary and secondary outcome measures                               | 5–6 |
|                                  | 6b | Any changes to trial outcomes after the trial commenced, with reasons                | N/A |
| Sample Size                      | 7a | How sample size was determined                                                       | 4   |
|                                  | 7b | When applicable, explanation of any interim analyses and stopping guidelines         | N/A |
| Randomization                    | 8a | Method used to generate the random allocation sequence                               | 5   |
|                                  | 8b | Type of randomization; details of any restriction (such as blocking, stratification) | 5   |
| Allocation Concealment Mechanism | 9  | Mechanism used to implement random allocation sequence (e.g., opaque envelopes)      | 5   |

|                     |     |                                                                                       |          |
|---------------------|-----|---------------------------------------------------------------------------------------|----------|
| Implementation      | 10  | Who generated the sequence, who enrolled participants, and who assigned interventions | 5        |
| Blinding (Masking)  | 11a | Who was blinded after assignment to interventions and how                             | 5        |
|                     | 11b | If relevant, description of the similarity of interventions                           | 5        |
| Statistical Methods | 12a | Statistical methods used to compare groups for primary and secondary outcomes         | 6–7      |
|                     | 12b | Methods for additional analyses (e.g., subgroup, adjusted analyses)                   | N/A      |
| Results             | 13a | Participant flow (numbers assigned, treated, and analyzed)                            | Figure 1 |
|                     | 13b | Losses and exclusions after randomization, with reasons                               | Figure 1 |
| Recruitment         | 14a | Dates defining recruitment and follow-up periods                                      | 4        |
|                     | 14b | Why the trial ended or was stopped                                                    | 4        |

|                         |     |                                                                                        |         |
|-------------------------|-----|----------------------------------------------------------------------------------------|---------|
| Baseline Data           | 15  | A table showing baseline demographic and clinical characteristics for each group       | Table 1 |
| Numbers Analyzed        | 16  | Number of participants (denominator) in each analysis                                  | 7       |
| Outcomes and Estimation | 17a | Results for each primary and secondary outcome, with effect size and precision         | 7–9     |
|                         | 17b | For binary outcomes, presentation of both absolute and relative effect sizes           | 8       |
| Ancillary Analyses      | 18  | Results of any other analyses performed, distinguishing pre-specified from exploratory | N/A     |
| Harms                   | 19  | All important harms or unintended effects in each group                                | 7–8     |
| Discussion              | 20  | Trial limitations, addressing sources of potential bias, imprecision, and multiplicity | 10–11   |
|                         | 21  | Generalizability (external validity, applicability) of the trial findings              | 11      |

|                   |    |                                                                      |                                        |
|-------------------|----|----------------------------------------------------------------------|----------------------------------------|
|                   | 22 | Interpretation consistent with results, balancing benefits and harms | 10–12                                  |
| Other Information | 23 | Registration number and name of trial registry                       | 2, 12                                  |
|                   | 24 | Where the full trial protocol can be accessed, if available          | Upon request from corresponding author |
|                   | 25 | Sources of funding and other support                                 | 12                                     |
|                   | 26 | Ethical approval and consent to participate                          | 12                                     |

### Additional Notes

Trial Registration: ChiCTR2500109737 (Chinese Clinical Trial Registry)

Registration date: 24 September 2025

Ethics Approval: Zhengzhou University Central China Fuwai Hospital Ethics Committee (Approval No. 37/2024)

Adherence: The study was conducted and reported in accordance with the CONSORT 2010 guidelines.
